# Supplementary material
Source: publisher figshare collection journal article supplement (https://tandf.figshare.com/ndownloader/files/13663922)
Supplement: Supplementary file 1 [file 13663922]

Supplementary material

*Quinquelaophonte aurantius* sp. nov., a new harpacticoid species (Copepoda: Harpacticoida: Laophontidae: *Quinquelaophonte*) from New Zealand

Maria P. Charry, John B. J. Wells, Vaughan Keesing, Kirsty F. Smith, Tristan J. Stringer, Louis A. Tremblay





Figure S1. *Quinquelaophonte candelabrum* female: A, urosomite-4, ventral; B–D, right caudal ramus dorsal, outer lateral and ventral; E, antennule; F, mandible palp; G, maxillule. [All scale bars represent 0.05mm.] [int = internal; ext = external]





Figure S2. *Quinquelaophonte candelabrum*: A, maxilla; B, male antennule [B1-3, segments 1-3; B4, segment 4; B5-7, segments 5-7]; C, male right P5; D, male right P6; E, male pair of P6 and ventral ornamentation of urosomite-3.
